# Supplementary material for: Advances in Single-Cell Printing
Source: MDPI journal article supplement (doi:10.3390/mi13010080), 2022-01-03
Supplement: s1 [file s1]

## Supporting Information

### Advances in Single-Cell Printing

Xiaohu Zhou, Han Wu, Haotian Wen, Bo Zheng\*

Institute of Cell Analysis, Shenzhen Bay Laboratory, Shenzhen 518132, Guangdong, China;

[zhouxh@szbl.ac.cn](mailto:zhouxh@szbl.ac.cn) (X.Z.); [wuhan@szbl.ac.cn](mailto:wuhan@szbl.ac.cn) (H.W.); [wenht@szbl.ac.cn](mailto:wenht@szbl.ac.cn) (H.W.);

\*Correspondence: [bozheng@szbl.ac.cn](mailto:bozheng@szbl.ac.cn)

Table S1 Summary of the single-cell printing strategies

| Technique                                                    | Mechanism                                                                    | Performance                                                  | Application                                    |
|--------------------------------------------------------------|------------------------------------------------------------------------------|--------------------------------------------------------------|------------------------------------------------|
| <b>Contact printing</b>                                      | Surface patterning by contract transfer                                      | Micropattern size and shape controllable [56,57]             | Cell patterns [56]                             |
|                                                              |                                                                              | Cell immobilization selectivity: > 75% [56]                  | Single cell array [57]                         |
|                                                              |                                                                              | Single cell capture efficiency: 94% [57]                     |                                                |
|                                                              |                                                                              |                                                              |                                                |
| <b>Acoustic field-assisted inkjet printing</b>               | Acoustic field                                                               | Number of cells per printing: Random [45] or 1 [46]          | Single cell array [45,46]                      |
|                                                              |                                                                              | Cell encapsulation efficiency: 98.4% [45]                    | Cell patterns [46, 105]                        |
|                                                              |                                                                              | Throughput: 1000 Hz [45]                                     | Cell-laden 3D hydrogel structures [103]        |
|                                                              |                                                                              |                                                              |                                                |
| <b>Label-free computer vision-based single-cell printing</b> | Piezoelectric actuation triggered by a computer vision system                | Number of cells per printing: 1 or multiple [40, 41, 81, 98] | Single cell array [40,41, 81]                  |
|                                                              |                                                                              | Single cell efficiency: 87% [40]; 90.3% [41]                 | Single cell real-time sorting [98]             |
|                                                              |                                                                              | Cell viability: 75% [40]; 96.6% [41]                         |                                                |
|                                                              |                                                                              | Throughput: 2 Hz with 90.3% single-cell efficiency [41]      |                                                |
| <b>Electric signals based single-cell printing</b>           | Piezoelectric pressure actuated by an electric signal                        | Number of cells per printing: 1 or multiple [42]             | Single-cell array [42]                         |
|                                                              |                                                                              | Single-cell efficiency: 73% [42]                             |                                                |
| <b>Pneumatic valves-based single-cell printing</b>           | Pneumatic pressure                                                           | Number of cells per printing: 1 [43, 99]                     | Single oocyte array [43]                       |
|                                                              |                                                                              | Single cell efficiency: ~100% [43, 99]                       | Cell size screening [99]                       |
|                                                              |                                                                              | Cell viability: 70% [43]; 90.64% [99]                        |                                                |
| <b>FACS based single-cell printing</b>                       | Dispensing droplets containing single cells based on the fluorescent signals | Number of cells per printing: 1 or multiple [93, 116]        | Single cell arrays and cell patterns [93, 116] |
|                                                              |                                                                              | Cell encapsulation efficiency: 99.5% [116]                   | Single-cell calcium release assay [93]         |
|                                                              |                                                                              | Single cell efficiency: 98% [93]                             |                                                |

|                                                     |                                                                           |                                                                                                                                                                                                                                                                                      |                                                                                    |
|-----------------------------------------------------|---------------------------------------------------------------------------|--------------------------------------------------------------------------------------------------------------------------------------------------------------------------------------------------------------------------------------------------------------------------------------|------------------------------------------------------------------------------------|
|                                                     |                                                                           | Cell viability: 94% [116]<br>Throughput: 1.5 Hz [93]; 100 Hz [116]                                                                                                                                                                                                                   | 3D well-defined spheroid [116]                                                     |
| <b>Limiting dilution based single-cell printing</b> | Dispensing droplets containing single cells with diluting cell suspension | Number of cells per printing: Random (almost Poisson distribution) [89, 110, 113]<br>Cell encapsulation efficiency: 46% [110]<br>Single cell efficiency: 91% (multiple droplets for each spot) [89]; 39% [110]; 43.8% [113]<br>Cell viability: 100% [89]<br>Throughput: 3~4 Hz [110] | Single cell assays [89]<br>Mass spectrometry-based single-cell analysis [110, 113] |
